# 1 **Quantifying Aphantasia through drawing: Those without visual imagery show** 2 **deficits in object but not spatial memory**

3  
4 Wilma A. Bainbridge<sup>1</sup>, Zoë Pounder<sup>2</sup>, Alison F. Eardley<sup>2</sup>, Chris I. Baker<sup>1</sup>

5  
6 1 – Laboratory of Brain and Cognition; National Institute of Mental Health, Bethesda, MD USA

7 2 – School of Social Sciences; University of Westminster, London, UK

## 8 9 Abstract

10  
11 Congenital aphantasia is a recently identified experience defined by the inability to form  
12 voluntary visual imagery, with intact semantic memory and vision. Although understanding  
13 aphantasia promises insights into the nature of visual imagery, as a new focus of study,  
14 research is limited and has largely focused on small samples and subjective report. The current  
15 large-scale online study of aphantasics (N=63) and controls required participants to draw real-  
16 world scenes from memory, and copy them during a matched perceptual condition. Drawings  
17 were objectively quantified by 2,700 online scorers for object and spatial details. Aphantasics  
18 recalled significantly fewer object details than controls, and showed a reliance on verbal  
19 strategies. However, aphantasics showed equally high spatial accuracy as controls, and made  
20 significantly fewer memory errors, with no differences between groups in the perceptual  
21 condition. This object-specific memory impairment in aphantasics provides evidence for  
22 separate systems in memory that support object versus spatial details.

## 23 24 Introduction

25  
26 Visual imagery, the ability to form visual mental representations, is a common human  
27 cognitive experience, yet it is has been hard to characterize and quantify. What is the nature of  
28 the images that come to mind when forming visual representations of objects or scenes? What  
29 might these representations look like if one lacks this ability? *Aphantasia* is a recently identified

30 experience, defined by an inability to create voluntary visual mental images, although semantic  
31 memory and vision remain intact [1,2]. Aphantasia is still largely uncharacterized, with many of  
32 its studies based on case studies or employing small sample sizes. Here, using an online crowd-  
33 sourced drawing task designed to quantify the content of visual memories [3], we examine the  
34 nature of aphantasics' mental representations of visual images within a large sample, and  
35 reveal evidence for separate object and spatial systems in human imagery.

36 Although some cases reporting an absence of mental imagery were first identified in the  
37 19<sup>th</sup> century [4], the term *aphantasia* has only recently been defined and investigated, within  
38 fewer than a dozen studies [1,2,4-8]. This is arguably because most individuals with aphantasia  
39 can lead functional, professional lives, with many individuals realizing their imagery experience  
40 differed from the majority only in adulthood. The current method for identifying if an individual  
41 has aphantasia is through subjective self-report, using the Vividness of Visual Imagery  
42 Questionnaire [9]. However, recent research has begun quantifying the experience using  
43 objective measures such as priming during binocular rivalry [2] and skin conductance during  
44 reading [7]. Since its identification, several prominent figures have come forth describing their  
45 experience with aphantasia, including economics professor Nicholas Watkins [10], Firefox co-  
46 creator Blake Ross [11], and former Pixar Chief Technology Officer Ed Catmull [12], leading to  
47 broader recognition of the experience.

48 Like congenital prosopagnosia [13], in the absence of any brain damage or trauma,  
49 aphantasia is considered to be congenital (although it can also be acquired through trauma  
50 [14]). However, beyond this, little research has examined the nature of aphantasia and the  
51 impact on imagery function and cognition more broadly. A single-participant aphantasia case  
52 study found no significant difference from controls in a visual imagery task (judging the location  
53 of a target in relation to an imagined shape) nor its matched version of a working memory task,  
54 except at the hardest level of difficulty [5]. However, aphantasics show significantly less  
55 imagery-based priming in a binocular rivalry task [2, 15], and show diminished physiological  
56 responses to fearful text as compared with controls [7]. While these studies have observed  
57 differences between aphantasics and controls, the nature of aphantasics' mental  
58 representations during visual recall is still unknown. Understanding these differences in

59 representation between aphantasics and controls could shed light on broader questions of  
60 what information (visual, semantic, spatial) makes up a memory, and how this information  
61 compares to the initial perceptual trace. In fact, the existence of aphantasia serves as key  
62 evidence against the hypothesis that visual perception and imagery rely upon the same neural  
63 substrates and representations [16], and also suggests a dissociation of visual recognition and  
64 recall (as aphantasia only affects the latter). Examination into aphantasia thus has wide-  
65 reaching potential implications for the understanding of the way we form mental  
66 representations of our world.

67         The nature and content of our visual imagery has proved incredibly difficult to quantify.  
68 Several studies in psychology have developed tasks to objectively study the cognitive process of  
69 mental imagery through visual working memory or priming (e.g., [9,17,18]). One of the long-  
70 standing debates within the imagery literature has been over the nature of images, and  
71 specifically whether visual imagery representations are depictive and picture-like in nature  
72 [19,20] or symbolic, “propositional” representations [21,22]. Neuropsychological research,  
73 especially in neuroimaging, has led to large leaps in our understanding of visual imagery.  
74 Studies examining the role and activation of the primary visual cortex during imagery tasks have  
75 been interpreted as supporting the depictive nature of imagery [23-26]. However,  
76 neuropsychological studies have identified patients with dissociable impairments in perception  
77 versus imagery [27,28], and recent neuroimaging work has suggested there may be  
78 systematically related yet separate cortical areas for perception and imagery, and that the  
79 neural representation during recall may lack much of the richer, elaborative processing of the  
80 initial perceptual trace [29-31]. Combined with research identifying situations where  
81 propositional encoding dominates spatial imagery (e.g., [32]), researchers have concluded that  
82 there is a role for both propositional and depictive elements in the imagery process (e.g., [33]).  
83 In their case study, Jacobs and colleagues [5] argue that differences in performance between  
84 aphantasic participant *AI* and neurotypical controls may result from different strategies,  
85 including a heavier reliance on propositional encoding, relying on a spatial or verbal code. Thus,  
86 ideally a task that measures both depictive (visual) and propositional (semantic) elements of a  
87 mental representation could directly compare the strategies used by aphantasics and controls.

88 In a recent study, impressive levels of both object and spatial detail could be quantified by  
89 drawings made by neurotypical adults in a drawing-based visual memory experiment [3]. Such  
90 drawings allow a more direct look at the information within one's mental representation of a  
91 visual image, in contrast to verbal descriptions or recognition-based tasks. A drawing task may  
92 allow us to identify what fundamental differences exist between aphantasics and individuals  
93 with typical imagery, and in turn inform us of what information exists within imagery.

94 In the current study, we examine the visual memory representations of congenital  
95 aphantasics and individuals with typical imagery (controls) for real-world scene images.  
96 Through online crowd-sourcing, we leverage the power of the internet to identify and recruit  
97 large numbers of both aphantasic and controls for a memory drawing task. We also recruit over  
98 2,700 online scorers to objectively quantify these drawings for object details, spatial details,  
99 and errors in the drawings. We discover a selective impairment in aphantasics for object  
100 memory, with significantly fewer visual details and evidence for increased semantic scaffolding.  
101 In contrast, for the items that they remember, aphantasics show spatial accuracy at the same  
102 high level of precision as controls. Aphantasics also show fewer memory errors and memory  
103 correction as compared to controls. These results may point to two systems that support object  
104 information versus spatial information in memory.

105

106

## Results

107

108 Aphantasic (N=63) and control (N=52) participants were recruited online through social  
109 media (Facebook, Twitter, and aphantasia-specific Facebook and Reddit communities) to  
110 participate in an online memory drawing experiment (Fig. 1a). The experiment comprised of  
111 five parts. First, participants studied three real-world scene images for 10s each (Fig. 1a), all  
112 pre-selected to give maximal information in a prior memory drawing study [3]. Second,  
113 participants were instructed to draw each of the three images from memory using a basic  
114 drawing canvas web interface that included a pencil tool, different colors, and the ability to  
115 erase and undo/redo. Participants did not know they would be tested through drawing until  
116 after studying the images, to prevent drawing-targeted study strategies. Participants were

117 given unlimited time to draw, and could draw in any order. Mouse movements were tracked  
 118 during drawing in order to measure drawing time and erasing behavior. Third, participants  
 119 completed a recognition task in which they indicated if they had previously seen each of six  
 120 images: the three images presented for drawing as well as three category-matched foils in the  
 121 experiment. Fourth, they were instructed to draw a copy of each of the first three images, while  
 122 viewing them. This phase again had unlimited time, and the images were presented in a  
 123 random order. Finally, participants completed the VVIQ [9] and Object-Spatial Imagery  
 124 Questionnaire (OSIQ [34]), and were asked for feedback with regards to the section of the  
 125 experiment they found most difficult, as well as asked several demographic questions. Only  
 126 aphantasics with a VVIQ score of 25 or below and controls with a VVIQ score of 40 or above  
 127 were used in the analyses [1], resulting in the exclusion of eight participants with intermediate  
 128 scores between 25 and 40.

129  
 130 a)

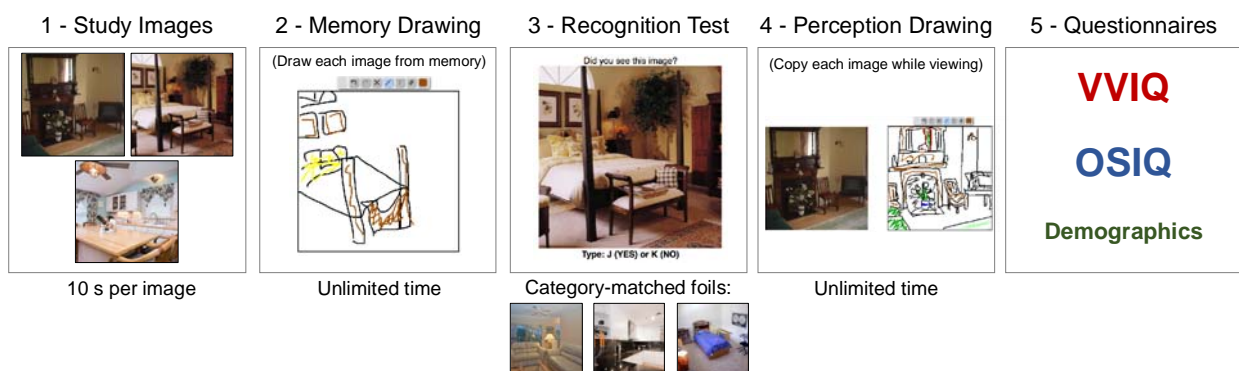

131  
 132 b)

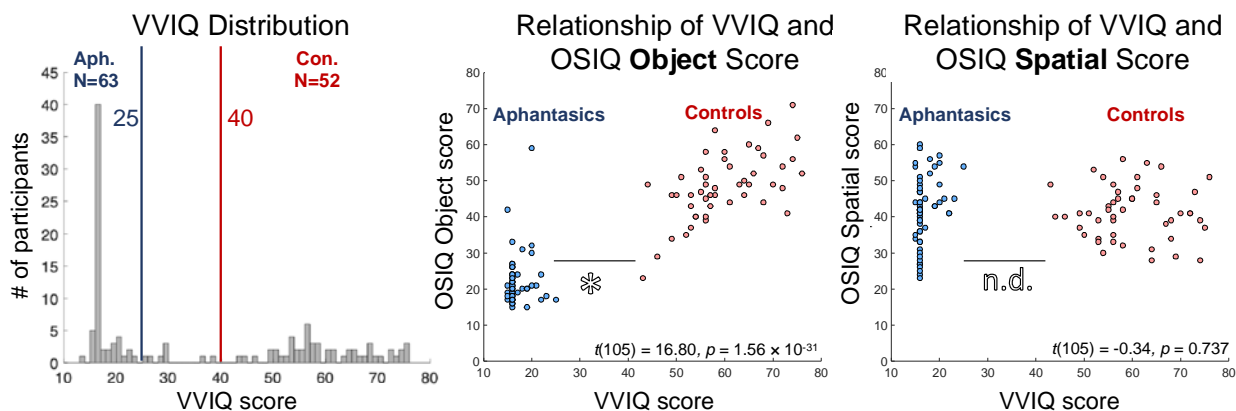

133

134 **Fig. 1. Experimental paradigm and basic demographics.** a) The experimental design of the online experiment.  
135 Participants studied three photographs, drew them from memory, completed a recognition task, copied the  
136 images while viewing them, and then filled out the VVIQ and OSIQ questionnaires in addition to  
137 demographics questions. You can try the experiment at  
138 <http://wilmabainbridge.com/research/aphantasia/aphantasia-experiment.html>. whole experiment took  
139 approximately 30 minutes. b) (Left) A histogram of the distribution of all participants across the VVIQ.  
140 Aphantasics were selected as those scoring 25 and below (N=63) and controls were selected as those scoring  
141 40 and above (N=52), while those in between were removed from the analyses (N=8). (Middle) A scatterplot  
142 of total VVIQ score plotted against total OSIQ Object component score for participants meeting criterion.  
143 Each point represents a participant, with aphantasics in blue and controls in red. There was a significant  
144 difference in OSIQ Object score between the two groups. (Right) A scatterplot of total VVIQ score plotted  
145 against OSIQ Spatial component score. There was no difference in OSIQ Spatial score between the two  
146 groups.

#### 148 **No demographic differences between groups, but reported differences in object and spatial** 149 **imagery**

150 First, we analyzed whether there were demographic differences between the groups.  
151 There was a significant difference in age between groups with aphantasics generally older than  
152 controls (aphantasic:  $M=41.16$  years,  $SD=14.22$ ; control:  $M=32.12$  years,  $SD=15.26$ ). However, if  
153 we conduct all analyses with a down-sampled set of 52 aphantasic participants with a matched  
154 age distribution, no meaningful differences in the results emerge. There was no significant  
155 difference in gender proportion between the two groups (aphantasic: 63.5% female; control:  
156 59.6% female; Pearson's chi-square test for proportions:  $\chi^2=0.18$ ,  $p=0.670$ ), even though a  
157 previous study reported a sample comprising of predominantly males (Zeman et al., 2015).  
158 There was no significant difference between participant sets in reported artistic abilities  
159 ( $t(113)=0.71$ ,  $p=0.480$ ).

160 Second, we investigated the relationship of the VVIQ score and OSIQ (Fig. 1b), a  
161 questionnaire developed to separate abilities to perform imagery with individual objects versus  
162 spatial relations amongst objects [34]. Controls scored significantly higher on the OSIQ than  
163 aphantasics ( $t(105) = 11.44$ ,  $p=3.60 \times 10^{-20}$ ). There was a significant correlation between VVIQ  
164 score and OSIQ score for control participants ( $M=89.73$ ,  $SD=10.97$ ; Spearman rank-correlation

165 test:  $p=0.54$ ,  $p=7.70 \times 10^{-5}$ ), but not for aphantasics (OSIQ  $M$  score=63.88,  $SD=12.12$ ;  $p=0.24$ ,  
166  $p=0.071$ ). When broken down by OSIQ subscale, there was a significant difference between  
167 groups in questions relating to object imagery ( $t(105)=16.80$ ,  $p=1.56 \times 10^{-31}$ ), but not spatial  
168 imagery ( $t(105)=-0.34$ ,  $p=0.737$ ). Indeed, a 2-way ANOVA (participant group  $\times$  subscale) reveals  
169 a main effect of participant group ( $F(1,210)=128.87$ ,  $p \sim 0$ ), subscale ( $F(1,210)=30.95$ ,  $p=8.00 \times$   
170  $10^{-8}$ ), and a significant interaction ( $F(1,210)=140.20$ ,  $p \sim 0$ ), confirming a difference in self-  
171 reported ratings for object imagery and spatial imagery respectively. This difference in self-  
172 reported object imagery and spatial imagery has been reported in previous studies [2], and  
173 suggests a potential difference between the two imagery subsystems.

174 Finally, given the focus of the current experiment on visual recall, we also compared  
175 measures of visual recognition performance. Both groups performed near ceiling at visual  
176 recognition of the images they studied, with no significant difference between groups in  
177 recognition hit rate (controls:  $M=0.96$ ,  $SD=0.12$ ; aphantasics:  $M=0.98$ ,  $SD=0.12$ ; Wilcoxon rank-  
178 sum test:  $Z=1.16$ ,  $p=0.245$ ), or false alarm rate (controls:  $M=0.02$ ,  $SD=0.12$ ; aphantasics:  $M=0$ ,  
179  $SD=0$ ; Wilcoxon rank-sum test:  $Z=1.13$ ,  $p=0.260$ ). These results indicate that there is no deficit  
180 in aphantasics for recognizing images, even with lures from the same semantic scene category.

181

## 182 **Diminished object information for aphantasics**

183 Next, we turned to analyzing the drawings made by the participants to reveal objective  
184 measures of the mental representations of these two groups. Looking at overall number of  
185 drawings made, while a small number of participants could not recall all three images, there  
186 was no significant difference between groups in number of images drawn from memory  
187 (control:  $M=2.92$ ,  $SD=0.27$ ; aphantasic:  $M=2.87$ ,  $SD=0.38$ ; Wilcoxon rank-sum test:  $Z=0.63$ ,  
188  $p=0.526$ ). To evaluate the drawings, 2,795 unique workers from the online experimental  
189 platform Amazon Mechanical Turk (AMT) scored the drawings on a variety of metrics including  
190 object information, spatial accuracy, and memory errors, using methods previously established  
191 for quantifying memory drawings [3]. Importantly, each participant completed both a memory  
192 drawing (i.e., drawing an image from memory for an unlimited time period) and a perception  
193 drawing (i.e., copying from a drawing for an unlimited time period) for each image, allowing us

194 to compare for each participant what is in memory versus what that individual would maximally  
195 draw given an image without memory constraints (refer to Fig. 2 for example drawings). This  
196 comparison allows us to control for differences in effort and drawing ability, which we should  
197 expect to be reflected in both types of drawings.

198



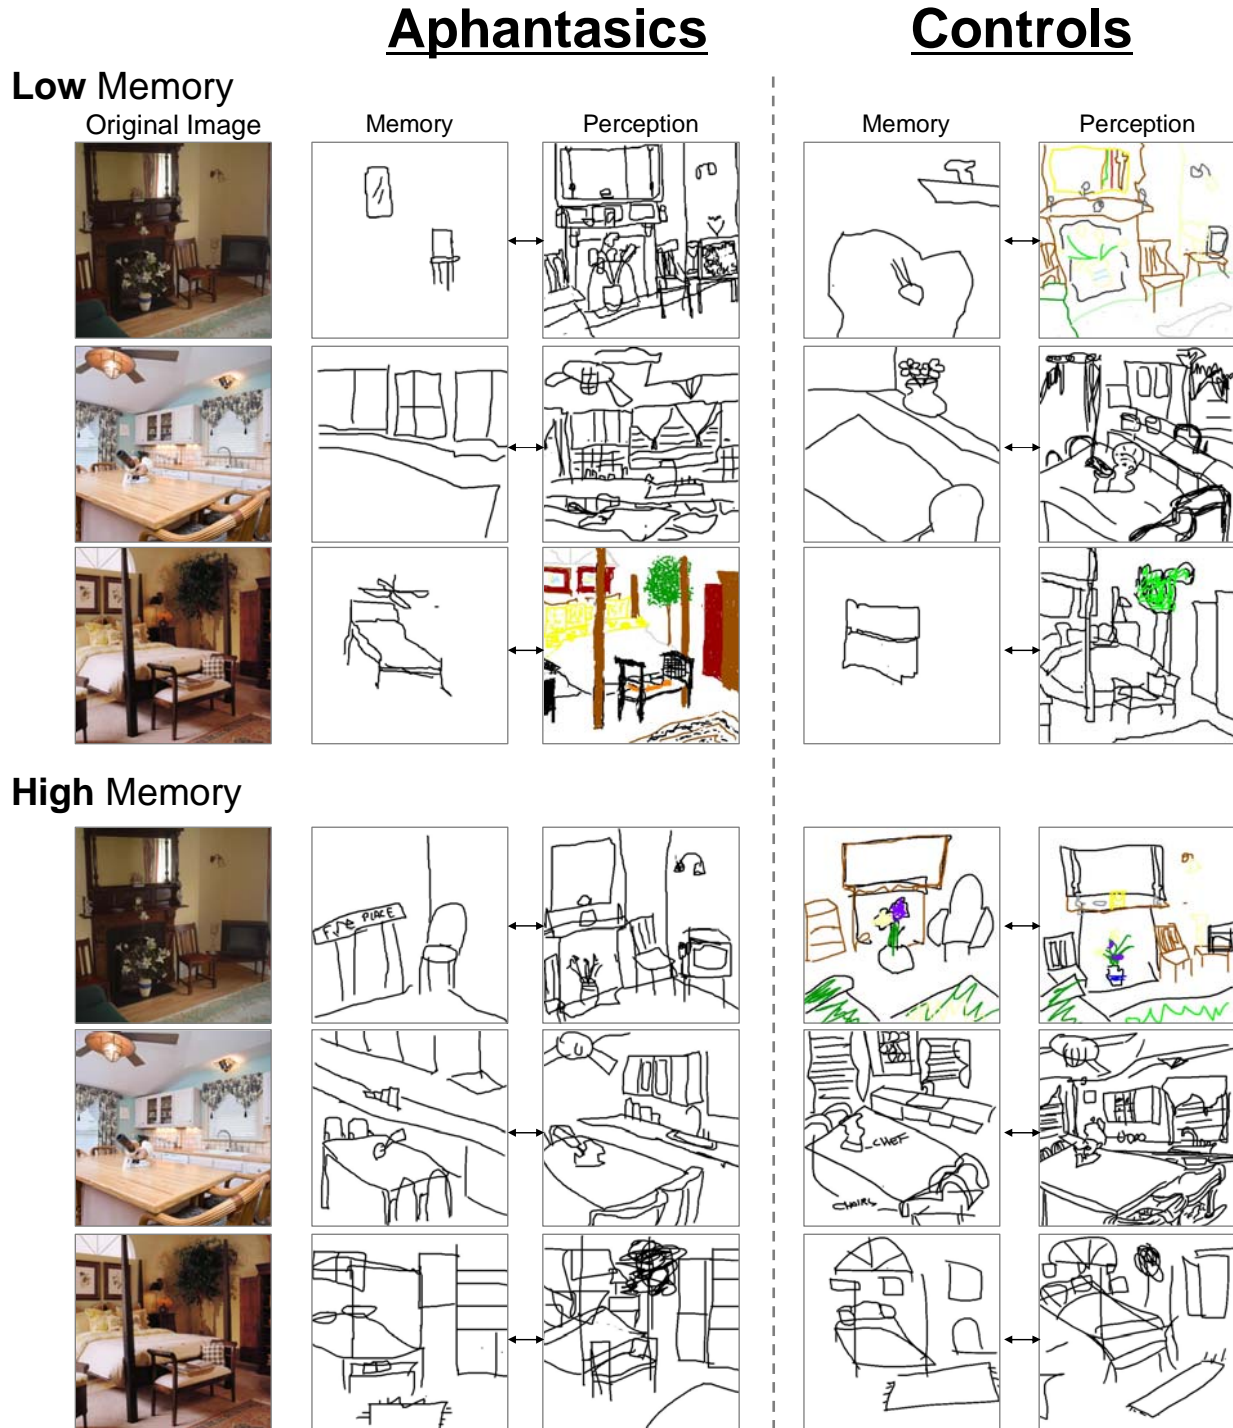

199

200

201

202

203

204

**Fig. 2. Example drawings.** Example drawings made by aphantasic and control participants from memory and perception (i.e., copying the image) showing the range of performance. Each row is a separate participant, and the memory and perception drawings connected by arrows are from the same participant. Low memory examples show participants who drew the fewest from memory but the most from perception. High memory examples show participants who drew the highest amounts of detail from both memory and perception.

205 These examples are all highlighted in the scatterplot of Fig. 3. The key question is whether there are  
206 meaningful differences between these two sets of participants' drawings.

207  
208 To score level of object information, AMT workers (N=5 per object) identified whether  
209 each of the objects in an image was present in each drawing of that image (Fig. 3). A 2-way  
210 ANOVA of participant group (aphantasic / control) × drawing type (memory / perception  
211 drawing, repeated measure) looking at number of objects drawn per image showed no  
212 significant overall effect of participant group ( $F(1,225)=0.69$ ,  $p=0.408$ ), but a significant effect of  
213 drawing type ( $F(1,225)=593.96$ ,  $p\sim 0$ ), and more importantly, a significant statistical interaction  
214 ( $F(1,225)=11.08$ ,  $p=0.0012$ ). Targeted post-hoc t-tests revealed that when drawing from  
215 memory, controls drew significantly more objects ( $M=6.32$  objects per image,  $SD=3.07$ ) than  
216 aphantasics ( $M=5.07$ ,  $SD=2.61$ ; independent samples t-test:  $t(113)=2.33$ ,  $p=0.022$ ) across the  
217 experiment. In contrast, when copying a drawing (perception drawing), aphantasics on average  
218 drew more objects from the images than controls, but with no significant difference (controls:  
219  $M=18.00$  objects per image,  $SD=5.81$ ; aphantasics:  $M=20.45$ ,  $SD=6.58$ ;  $t(113)=0.86$ ,  $p=0.392$ ).  
220 These results suggest that aphantasics are showing a specific deficit in recalling object  
221 information during memory.

222 Given that some participants tended to draw few objects even when copying from an  
223 image, we also investigated a corrected measure, taken as the number of objects drawn from  
224 memory divided by the number of objects drawn from perception, for each image for each  
225 participant. Drawings from perception with fewer than 5 objects were not included in the  
226 analysis, to remove any low-effort trials. Aphantasics drew a significantly smaller proportion of  
227 objects from memory than control participants (aphantasic:  $M=0.269$ ,  $SD=0.173$ ; control:  
228  $M=0.369$ ,  $SD=0.162$ ; Wilcoxon rank-sum test:  $Z=3.88$ ,  $p=1.02 \times 10^{-4}$ ). We also investigated the  
229 correlation within groups between the number of objects drawn from memory and the number  
230 drawn from perception. Controls show a strong correlation, where the more objects one draws  
231 from perception, the more one also tends to draw from memory (Pearson correlation:  $r=0.45$ ,  
232  $p=7.94 \times 10^{-4}$ ). Aphantasics show a significant, but much weaker relationship ( $r=0.27$ ,  $p=0.038$ ).

233 We also assessed the relationship between performance in the task and self-reported  
234 object imagery in the OSIQ. Across groups, there was a significant correlation between

235 proportion of objects drawn from memory and OSIQ object score (Spearman's rank correlation:  
236  $\rho=0.31$ ,  $p=9.43 \times 10^{-4}$ ), although these correlations were not significant when separated by  
237 participant group ( $p>0.10$ ).

238

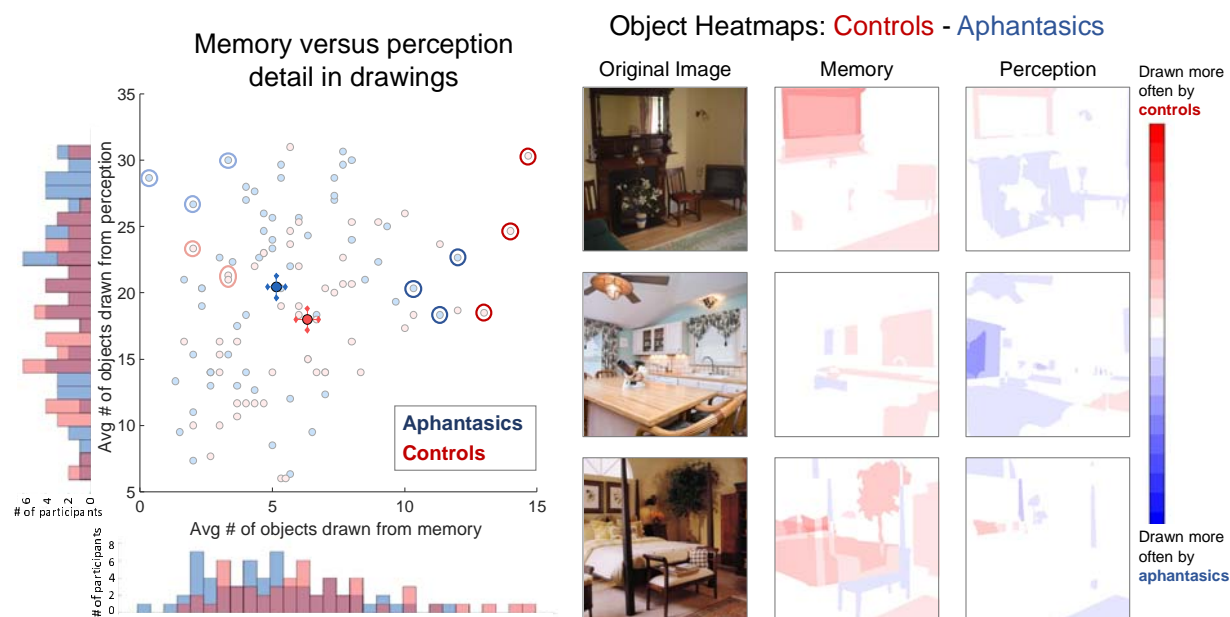

239  
240 **Fig. 3. Comparison of object information in drawings between aphantasics and controls.** (Left) A scatterplot

241 of each participant as a point, showing average number of objects drawn from memory across the three  
242 images (x-axis), versus average number of objects drawn from perception across the three images (y-axis).

243 Aphantasics are in blue, while controls are in red. The bright blue circle indicates average aphantasic  
244 performance, while the bright red circle indicates average control performance, with crosshairs for both  
245 indicating standard error of the mean for memory and perception respectively. Histograms on the axes show

246 the number of participants who drew each number of objects. Controls drew significantly more objects from  
247 memory, although with a tendency towards fewer from perception. The highlighted light blue and red points

248 are the participants with the lowest memory performance shown in Fig. 2, while the highlighted dark blue

249 and red points are the participants with the highest memory performance shown in Fig. 2. (Right) Heatmaps

250 of which objects for each image tended to be drawn more by controls (red) or aphantasics (blue). Pixel value

251 represents the proportion of control participants who drew that object in the image subtracted by the

252 proportion of aphantasics who drew that object (with a range of -1 to 1). Controls remembered more objects

253 (i.e., there is more red in the memory heatmaps), even though aphantasics tended to copy more objects (i.e.,

254 there is more blue in the perception heatmaps).

255

256  
257           Next, we examined whether there was a difference in visual detail within objects, by  
258 quantifying whether participants included color in their object depictions. Significantly more  
259 memory drawings by controls contained color than those by aphantasics (control: 38.2%,  
260 aphantasics: 21.0%; Pearson's chi-square test for proportions:  $\chi^2=11.07$ ,  $p=8.78 \times 10^{-4}$ ), while  
261 there was no difference for perception drawings (control: 46.2%, aphantasic: 38.0%,  $\chi^2=2.12$ ,  
262  $p=0.146$ ). Control participants also spent significantly longer time on their memory drawings  
263 than aphantasics (control:  $M=2023.5$  ms per image,  $SD=1383.6$  ms; aphantasics:  $M=1002.7$  ms,  
264  $SD=654.7$ ms;  $t(110) = 5.14$ ,  $p=1.19 \times 10^{-6}$ ), possibly implying more attention to detail in their  
265 drawings. We investigated other forms of object detail, by having AMT workers ( $N=777$ ) judge  
266 whether different object descriptors (e.g., material, texture, shape, aesthetics; generated by  
267 304 separate AMT workers) applied to each drawn object. This task did not identify differences  
268 between groups for the memory drawings ( $t(115)=0.14$ ,  $p=0.886$ ), although objects were  
269 significantly more detailed when copied than when drawn from memory for both aphantasics  
270 (memory:  $M=42.2\%$  descriptors per object applied,  $SD=5.1\%$ ; copied:  $M=45.7\%$ ,  $SD=4.0\%$ ;  
271  $t(127)=4.31$ ,  $p=3.23 \times 10^{-5}$ ) and control participants (memory:  $M=42.1\%$ ,  $SD=5.6\%$ ; copied:  
272  $M=47.0\%$ ,  $SD=3.8\%$ ;  $t(102)=5.20$ ,  $p=1.01 \times 10^{-6}$ ). However, it is possible this task may have  
273 asked for too fine-grained information than can be measured from these drawings (e.g., judging  
274 the material and texture of a drawn chair).

275           In sum, these results present concrete evidence that aphantasics recall fewer objects  
276 than controls, and these objects contain less visual detail (i.e., color) within their memory  
277 representations.

278

### 279 **Aphantasics show greater dependence on symbolic representations**

280           While aphantasics show decreased object information in their memory drawings, they  
281 are still able to successfully draw some objects from memory (5.07 objects per image on  
282 average). Do these drawings reveal evidence for alternative, non-visual strategies that may  
283 have supported this level of performance? To test this question, we quantified the amount of  
284 text used to label objects included in the participants' drawings. Note that while labeling was

285 allowed (the instructions stated: “Please draw or label anything you are able to remember”), it  
286 was effortful as it required drawing the letters with the mouse. We found that significantly  
287 more memory drawings by aphantasics contained text than those by controls (aphantasic:  
288 27.8%, control: 16.0%;  $\chi^2=6.84$ ,  $p=0.009$ ). Further, there was no difference between groups for  
289 perception drawings (aphantasic: 2.8%, control: 0.8%;  $\chi^2=1.66$ ,  $p=0.197$ ). These results imply  
290 that aphantasics may have relied upon symbolic representations to support their memory.

291       Comments by aphantasics at the end of the experiment supported their use of symbolic  
292 strategies. When asked what they thought was difficult about the task, one participant noted,  
293 “Because I don’t have any images in my head, when I was trying to remember the photos, I  
294 have to store the pieces as words. I always have to draw from reference photos.” Another  
295 aphantasic stated, “I had to remember a list of objects rather than the picture,” and another  
296 said, “When I saw the images, I described them to myself and drew from that description, so I...  
297 could only hold 7-9 details in memory.” In contrast, control participants largely commented on  
298 their lack of confidence in their drawing abilities: e.g., “I am very uncoordinated so making  
299 things look right was frustrating”; “I can see the picture in my mind, but I am terrible at  
300 drawing.”

301

### 302 **Aphantasics and controls show equally high spatial accuracy in memory**

303       While aphantasics show an impairment in memory for object information, do they also  
304 show an impairment in spatial placement of the objects? To test this question, AMT workers  
305 (N=5 per object) drew an ellipse around the drawn version of each object, allowing us to  
306 quantify the size and location accuracy of each drawn object (Fig. 4). When drawing from  
307 memory, there was no significant difference between groups in object location error in the x-  
308 direction (aphantasic:  $M$  pixel error=63.99,  $SD=31.18$ ; control:  $M=60.63$ ,  $SD=28.45$ ;  $t(113)=0.60$ ,  
309  $p=0.551$ ) nor the y-direction (aphantasic:  $M=64.97$ ,  $SD=29.90$ ; control:  $M=69.10$ ,  $SD=29.72$ ;  
310  $t(113)=0.74$ ,  $p=0.461$ ). However, this lack of difference was not due to difficulty in spatial  
311 accuracy; both groups’ drawings were incredibly spatially accurate, with all average errors in  
312 location less than 10% of the size of the images themselves. Similarly, there was also no  
313 significant difference in drawn object size error in terms of width (aphantasic:  $M$  pixel

314 error=23.06,  $SD=10.88$ ; control:  $M=24.89$ ,  $SD=13.58$ ;  $t(113)=0.81$ ,  $p=0.422$ ) and height  
315 (aphantasic:  $M=26.80$ ;  $SD=14.01$ ; control:  $M=22.82$ ;  $SD=11.05$ ;  $t(113)=1.66$ ,  $p=0.099$ ), and these  
316 sizes were incredibly accurate in both groups (average errors less than 4% of the image size).  
317 There was no correlation between a participant's level of object location or size error and  
318 ratings on the OSIQ spatial questions (all  $p>0.250$ ). In all, these results show that both  
319 aphantasics and controls have highly accurate memories for spatial location, with no  
320 observable differences between groups.

321

### Average object locations for memory drawings

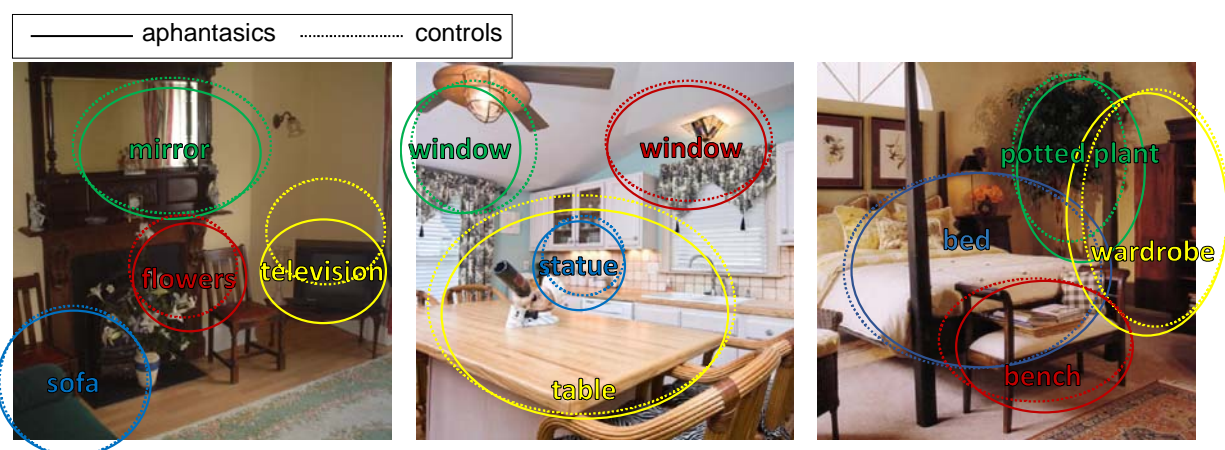

322  
323 **Fig. 4. Average object locations and sizes recalled by aphantasics and controls.** Average object locations and  
324 sizes for memory drawings of four of the main objects from each image, made by aphantasics (solid lines) and  
325 controls (dashed lines). Even though these objects were drawn from memory, their location and size accuracy  
326 was still very high. Importantly, aphantasics and controls showed no significant differences in object location  
327 or size accuracy.

328

### 329 **Aphantasics draw fewer false objects than controls**

330 Finally, we quantified the amount of error in participants' drawings from memory by  
331 group. AMT workers ( $N=5$  per drawing) viewed a drawing and its corresponding image and  
332 wrote down all objects in the drawings that were not present in the original image (essentially  
333 quantifying false object memories). Significantly more memory drawings by controls contained  
334 false objects than drawings by aphantasics (control: 12 drawings, aphantasic: 3 drawings;

335 Pearson chi-square test:  $\chi^2=9.35$ ,  $p=0.002$ ); examples can be seen in Fig. 5. Similarly,  
336 significantly more objects drawn by controls were false alarms than those drawn by aphantasics  
337 ( $\chi^2=5.09$ ,  $p=0.024$ ). This indicates that control participants were making more memory errors,  
338 even after controlling for the fewer number of objects drawn overall by aphantasics.  
339 Interestingly, all aphantasic errors (see Fig. 5) were transpositions from another image and  
340 drawn in the correct location as the original object (a tree from the bedroom to the living room,  
341 a window from the kitchen to the living room, and a ceiling fan from the kitchen to the  
342 bedroom). In contrast, several false memories from controls were objects that did not exist  
343 across any image but instead appeared to be filled in based on the scene category (e.g., a piano  
344 in the living room, a dresser in the bedroom, logs in the living room). No perception drawings  
345 by participants from either group contained false objects.  
346

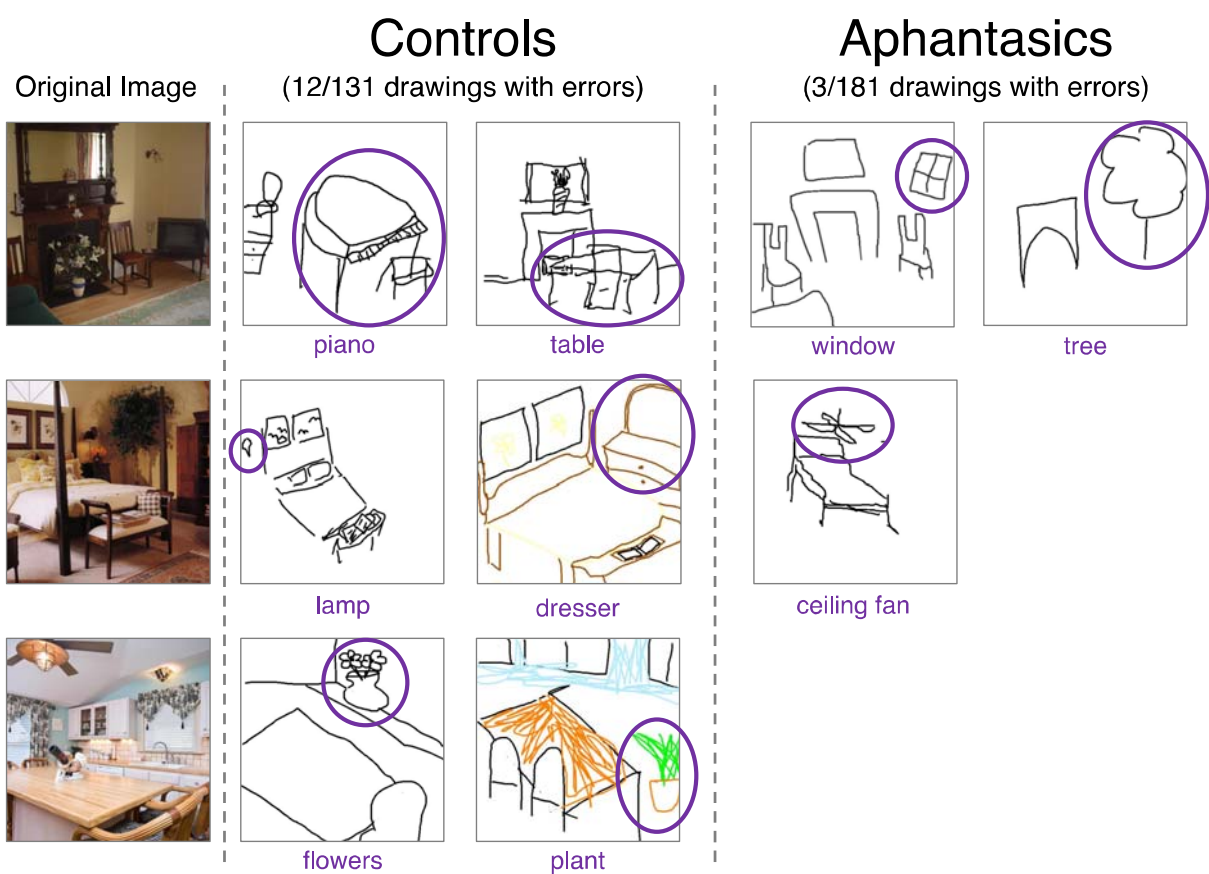

347  
348 **Fig. 5. False object memories in the drawings.** Examples of the false object memories made by participants  
349 in their memory drawings, with the inaccurate objects circled. Control participants made significantly more

350 errors, with only 3 out of 181 total aphantasic drawings containing a falsely remembered object. Note, all  
351 aphantasic errors were also transpositions from other drawings.

352  
353 As another metric of memory error, we also coded whether a drawing was edited or not,  
354 based on tracked mouse movements. A drawing was scored as edited if at least one line was  
355 drawn and then erased during the drawing. Significantly more memory drawings by control  
356 participants had editing than those by aphantasic participants (aphantasic: 27.6%, control:  
357 46.6%;  $\chi^2=11.90$ ,  $p=6.63 \times 10^{-4}$ ). There was no significant difference in editing between groups  
358 for the perception drawings (aphantasic: 37.4%, control: 47.7%;  $\chi^2=3.31$ ,  $p=0.069$ ), indicating  
359 these differences are not due to differences in effort.

360

## 361 Discussion

362

363 Through a drawing task with a large online sample, we conducted an in-depth  
364 characterization of the mental representations held by congenital aphantasics, a recently  
365 identified group of individuals who self-report the inability to form voluntary visual imagery.  
366 We discover that aphantasics show impairments in object memory, drawing fewer objects,  
367 containing less color. Further, we find evidence for greater dependence on symbolic  
368 information in the task, with more text in their drawings and common self-reporting of verbal  
369 strategies. However, aphantasics show no impairments in spatial memory, positioning objects  
370 at accurate locations with the correct sizes. Further, aphantasics show significantly fewer errors  
371 in memory, with fewer falsely recalled objects, and less correction of their drawings.  
372 Importantly, we observe no significant differences between controls and aphantasics when  
373 drawing directly from an image, indicating these differences are specific to memory and not  
374 driven by differences in effort, drawing ability, or perceptual processing.

375 Collectively, these results point to a dissociation in imagery between object-based  
376 information and spatial information. In addition to selective deficits in object memory over  
377 spatial memory, aphantasics subjectively report a lower preference for object imagery  
378 compared to spatial imagery in the OSIQ. This supports the previous findings in the smaller  
379 dataset (N=15) of Keogh & Pearson [2], which first reported differences in OSIQ measures.



380 Further, participants' reported object imagery abilities correlated with the number of objects  
381 they drew from memory. These consistent results both confirm the OSIQ as a meaningful  
382 measure, while also demonstrating how such deficits can be captured by a behavioral measure  
383 such as drawing. While a similar dissociation between object and spatial memory has been  
384 observed in other paradigms and populations, this is the first study to identify this in a  
385 population of individuals in the absence of trauma or changes in brain pathology. Cognitive  
386 decline from aging and dementia have shown selective deficits in object identification versus  
387 object localization [35], owing to changes in the medial temporal lobe, where the perirhinal  
388 cortex is thought to contribute to object detail recollection, while the parahippocampal cortex  
389 contributes to scene detail recollection [36]. The neocortex is also considered to be organized  
390 along separate visual processing pathways, with ventral regions primarily coding information  
391 about visual features, and parietal regions coding spatial information [37-41]. These findings  
392 also suggest interesting parallels between the imagery experience of individuals with  
393 aphantasia and individuals that are congenitally totally blind, who have been shown to perform  
394 similarly to typically sighted individuals on a variety of spatial imagery tasks [42-45].  
395 Neuroimaging of aphantasics will be an important next step, to see whether these impairments  
396 are manifested in decreased volume or connectivity of regions specific to the imagery of visual  
397 details, such as anterior regions within inferotemporal cortex [23,31,46,47] or medial parietal  
398 regions implicated in memory recall [30,48-50].

399 Further investigations on aphantasics will also provide critical insight on the nature of  
400 imagery, and how it compares to different forms of memory. While aphantasics show an  
401 impairment at recall performance, no evidence has shown impairments in visual recognition,  
402 and indeed our study also observes near-ceiling recognition performance. These results support  
403 other converging evidence pointing towards a neural dissociation in the processes of quick,  
404 automatic visual recognition and slower, elaborative visual recall [3, 51-54]. Aphantasics also  
405 report fully intact verbal recall abilities, and our results suggest that they may be using semantic  
406 strategies, in combination with accurate spatial representations, to compensate for their lack of  
407 visual imagery. In fact, in the current study, aphantasics' drawings from memory contained  
408 more text than those of controls, potentially indicating a semantic propositional coding of their

409 memories to perform the task. Imagery of a visual stimulus thus may not necessarily be visual in  
410 nature; while forming a visual representation of the scene or object may be one way to  
411 undertake the task, there may be other, non-visual strategies to complete the task. Even in  
412 neurotypical adults, imagery-based representations in the brain may differ from perceptual  
413 representations of the same items [31]. Further neuroimaging investigations will lead to an  
414 understanding of the neural mechanisms underlying these different strategies.

415 Further, aphantasics' lower errors in memory (e.g., fewer falsely recalled objects  
416 compared to controls) could possibly reflect higher accuracy in semantic memory versus  
417 controls, to compensate for visual memory difficulties. Aphantasics may serve as an ideal  
418 population to probe the difference between visual and semantic memory and their interaction  
419 in both behavior and the brain. Additionally, while aphantasia has thus far only been quantified  
420 in the visual domain, preliminary work suggests that the experience may extend to other  
421 modalities [1]. Using a multimodal approach, researchers may be able to pinpoint neural  
422 differences in aphantasics across other sensory modalities, for instance, the auditory domain  
423 which has shown to have several characteristics similar to the visual domain [55-57].

424 Finally, these results serve as essential evidence to suggest that aphantasia is a valid  
425 experience, defined by the inability to form voluntary visual images with a selective impairment  
426 in object imagery. Previous work has shown relatively intact performance by aphantasics on  
427 imagery and visual working memory tasks [5], and some researchers have proposed aphantasia  
428 may be more psychogenic than a real impairment [8]. However, in the current study, we  
429 observe a selective impairment in object imagery for aphantasics in comparison to controls.  
430 Importantly, if such an impairment were caused by intentional efforts to demonstrate an  
431 impairment, we would expect decreased performance in spatial accuracy, decreased  
432 performance in the perceptual drawing task, or low ratings in all questions of the OSIQ rather  
433 than solely the object imagery component. However, in all of these cases, aphantasics  
434 performed identically with controls. In fact, aphantasics even showed higher memory precision  
435 than controls on some measures, including significantly fewer memory errors and fewer editing  
436 in their drawings. Further, the correlations between the VVIQ, OSIQ, and drawn object  
437 information lend validity to the self-reported questionnaires in capturing true behavioral

438 deficits. This being said, while we observed a deficit in object memory for aphantasics, it was  
439 not a complete elimination of object memory abilities. Aphantasics were still able to draw a  
440 handful of objects from memory (five per image). While this moderate performance could be  
441 due to some preserved ability at object memory, this performance could also reflect the use of  
442 verbal lists of objects combined with intact, accurate spatial memory to reconstruct a scene.  
443 Future work will need to directly compare visual and verbal strategies, and push the limits to  
444 see what occurs when there is more visual detail than can be supported by verbal strategies.

445 In conclusion, leveraging the wide reach of the internet, we have been able to conduct  
446 an in-depth and large scale study of the nature of aphantasics' mental representations for  
447 visual images. Aphantasics have a unique mental experience that can provide essential insights  
448 into the nature of imagery, memory, and perception. Their drawings reveal a complex, nuanced  
449 story that show impaired object memory, with a combination of semantic and spatial strategies  
450 used to reconstruct scenes from memory. Collectively, these results suggest a dissociation in  
451 object and spatial information in visual memory.

452

## 453 Methods

454

### 455 **Participants**

456 N=115 adults participated in the main online experiment, while 2,795 adults  
457 participated in online scoring experiments on Amazon Mechanical Turk (AMT) of the drawings  
458 from the main experiment. Aphantasic participants for the main experiment were recruited  
459 from aphantasia-targeted forums, including "Aphantasia (Non-Imager/Mental Blindness)  
460 Awareness Group", "Aphantasia!" and Aphantasia discussion pages on Reddit. Control  
461 participants for the main experiment were recruited from the population at the University of  
462 Westminster, online social media sites such as Facebook and Twitter pages for the University of  
463 Westminster Psychology, and "Participate in research" pages on Reddit. Scoring participants  
464 were recruited from the general population of AMT.

465 No personally identifiable information was collected from any participants, and  
466 participants had to acknowledge participation in order to continue, following the guidelines

467 approved by the University of Westminster Psychology Ethics Committee (ETH1718-2345) and  
468 the National Institutes of Health Office of Human Subjects Research Protections (18-NIMH-  
469 00696).

470

### 471 **Main Experiment: Drawing Recall Experiment**

472 The Drawing Recall Experiment was a fully online experiment that consisted of seven  
473 sections ordered: 1) study phase, 2) recall drawing phase, 3) recognition phase, 4) copied  
474 drawing phase, 5) The Vividness of Visual Imagery Questionnaire (VVIQ), the 6) Object-Spatial  
475 Imagery Questionnaire (OSIQ), and 7) basic demographic questions. The methods of the  
476 experiment are summarized in Fig. 1a.

477 For the study phase, participants were told to study three images in as much detail as  
478 possible. The images were presented at 500 x 500 pixels. They were shown each image for 10 s,  
479 presented in a randomized order with a 1 s interstimulus interval (ISI). These three images (see  
480 Fig 1a) were selected from a previously validated memory drawing study [3], as the images with  
481 the highest recall success, highest number of objects, and several unique elements compared to  
482 a canonical representation of its category. For example, the kitchen scene does not include  
483 several typical kitchen components such as a refrigerator, microwave, or stove, and does  
484 include more idiosyncratic objects such as a ceramic chef, zebra-printed chairs, and a ceiling fan.  
485 This is important as we want to assess the ability to recall unique visual information beyond just  
486 a coding of the category name (e.g., just drawing a typical kitchen). Participants were not  
487 informed what they would do after studying the images, to prevent targeted memory strategies.

488 Next, the recall drawing phase tested what visual representations participants had for  
489 these images through drawing. Participants were presented with a blank square with the same  
490 dimensions as the original images and told to draw an image from memory in as much detail as  
491 possible using their mouse. Participants drew using an interface like a simple paint program.  
492 They could draw with a pen in multiple colors, erase lines, and undo or redo actions. They were  
493 given unlimited time and could draw the images in any order. They were also instructed that  
494 they could label any unclear items. Once a participant finished a drawing, they then moved  
495 onto another blank square to start a new drawing. They were asked to create three drawings

496 from memory, and could not go back to edit previous drawings. As they were drawing, their  
497 mouse movements were recorded to track timing and erasing behavior.

498         The recognition phase tested whether there was visual recognition memory for these  
499 specific images. Participants viewed images and were told to indicate whether they had seen  
500 each image before or not. The images consisted of the three images presented in the study  
501 phase as well as three new foil images of the same scene categories (kitchen, bedroom, living  
502 room). Matched foils were used so that recognition performance could not rely on recognizing  
503 the category type alone. All images were presented at 500 x 500 pixels. Participants were given  
504 unlimited time to view the image and respond, and a fixation cross appeared between each  
505 image for 200 ms.

506         The copied drawing phase had participants copy the drawings while viewing them, in  
507 order to see how participants perceive each image. This phase gives us an estimate of the  
508 participant's drawing ability and ability to use this drawing interface with a computer mouse to  
509 create drawings. This phase also measures the maximum information one might draw for a  
510 given image (e.g., you won't draw every plate stacked in a cupboard). Participants saw each  
511 image from the study phase presented next to a blank square. They were instructed to copy the  
512 image in as much detail as possible. The blank square used the same interface as the recall  
513 drawing phase. When they were done, they could continue onto the next image, until they  
514 copied all three images from the study phase. The images were tested in a random order, and  
515 participants had as much time as they wanted to draw each image.

516         Finally, participants filled out three questionnaires at the end. They completed the VVIQ  
517 [9], which measures the vividness of one's visual mental images, and currently serves as the  
518 main tool for diagnosing aphantasia. They also completed the more recent OSIQ [34], which  
519 separately measures visual imagery for object information and spatial information. Finally,  
520 participants provided basic demographics, basic information about their computer interface,  
521 and their experience with art. In these final questions, they indicated which component of the  
522 experiment was most difficult, and were able to write comments on why they found it difficult.

523

524 **Online Scoring Experiments**

525           In order to objectively and rapidly score the 692 drawings produced in the Drawing  
526 Recall Experiment, we conducted online crowd-sourced scoring experiments with a set of 2,795  
527 participants on AMT. None of these participants took part in the Drawing Recall Experiment.  
528 For all online scoring experiments, scorers could participate in as many trials as they wanted,  
529 and were compensated for their time.

530

### 531 *Object Selection Study*

532           AMT scorers were asked to indicate which objects from the original images were in each  
533 drawing. This allows us to systematically measure how many and what type of objects exists in  
534 the drawings. They were presented with one drawing and five photographs of the original  
535 image with a different object highlighted in red. They had to click on all object images that were  
536 contained in the original drawing. Five scorers were recruited per object, with 909 unique  
537 scorers in total. An object was determined to exist in the drawing if at least 3 out of 5 scorers  
538 selected it.

539

### 540 *Object Location Study*

541           For each object, AMT scorers were asked to place an oval around that object in the  
542 drawing, in order to get information on the location and size accuracy of the objects in the  
543 drawings. AMT scorers were instructed on which object to circle in the drawing by the original  
544 image with the object highlighted in red, and only objects selected in the Object Selection Study  
545 were used. Five scorers were recruited per object, with 1,310 unique scorers in total. Object  
546 location and size (in both the x and y directions) were taken as the median pixel values across  
547 the five scorers.

548

### 549 *Object Details Study*

550           AMT scorers here indicated what details existed in the specific drawings. In a first AMT  
551 experiment, five scorers per object (N=304 total) saw each object from the original images and  
552 were asked to list 5 unique traits about the object (e.g., shape, material, pattern, style). A list of  
553 unique traits was then created for each object in the images. In a second AMT experiment,

554 scorers were then shown each object in the drawings (highlighted by the ellipse drawn in the  
555 Object Location Study), and had to indicate whether that trait described the object or not. Five  
556 scorers were recruited per trait per drawn object, with 777 unique scorers in total.

557

### 558 *False Memories Study*

559 AMT scorers were asked to indicate “false memories” in the drawings—what objects  
560 were drawn in the drawing that didn’t exist in the original image? Scorers were shown a  
561 drawing and its corresponding image and were asked to write down a list of all false objects.  
562 Nine scorers were recruited per drawing, with 337 unique scorers in total. An object was  
563 counted as a false memory if at least three scorers listed it.

564

### 565 **Additional Drawing Scoring Metrics**

566 In addition to the Online Scoring Experiments, other attributes were collected for the  
567 drawings. A blind scorer (the corresponding author) went through each drawing presented in a  
568 random order (without participant or condition information visible) and had to code *yes* or *no*  
569 for if the drawing 1) contained any color, 2) contained any text, and 3) contained any erasures.  
570 Erasures were quantified by viewing the mouse movements used for drawing the image, to see  
571 if lines were drawn and then erased, and did not make it into the final image.

572

573

### References

574

575 [1] Zeman, A.Z.J., Dewar, M.T., & Della Sala, S. Lives without imagery – congenital aphantasia.  
576 *Cortex* **73**, 378-380 (2015).

577

578 [2] Keogh, R., & Pearson, J. The blind mind: No sensory visual imagery in aphantasia. *Cortex* **105**,  
579 53-60 (2017).

580

581 [3] Bainbridge, W.A., Hall, E.H., & Baker, C.I. Highly diagnostic and detailed content of visual  
582 memory revealed during free recall of real-world scenes. *Nat. Commun.* **10**, 5. (2019).

583

584 [4] Galton, F. Statistics of Mental Imagery. *Mind* **5**, 301-318 (1880).

585

586 [5] Jacobs, C., Schwarzkopf, D.S., & Silvanto, J. Visual working memory performance in  
587 aphantasia. *Cortex* **105**, 61-73 (2018).

588

589 [6] Brons, L. Aphantasia, SDAM, and Episodic Memory. *Japan Assoc. Philos. Sci.* **28**, 9-32 (2019).

590

591 [7] Wicken, M., Keogh, R., & Pearson, J. The critical role of mental imagery in human emotion:  
592 insights from Aphantasia. Preprint at <https://www.biorxiv.org/content/10.1101/726844v1>  
593 (2019).

594

595 [8] de Vito, S., & Bortolomeo, P. Refusing to imagine? On the possibility of psychogenic  
596 aphantasia. A commentary on Zeman et al. (2015). *Cortex* **74**, 334-335 (2016).

597

598 [9] Marks, D.F. Visual imagery differences in the recall of pictures. *Br. J. Psychol.* **64**, 17-24  
599 (1973).

600

601 [10] Watkins, N.W. Visual working memory performance in aphantasia. *Cortex* **105**, 41-52  
602 (2018).

603

604 [11] Ross, B. Aphantasia: How it feels to be blind in your mind. *Facebook*, at  
605 [https://www.facebook.com/notes/blake-ross/aphantasia-how-it-feels-to-be-blind-in-your-](https://www.facebook.com/notes/blake-ross/aphantasia-how-it-feels-to-be-blind-in-your-mind/10156834777480504/)  
606 [mind/10156834777480504/](https://www.facebook.com/notes/blake-ross/aphantasia-how-it-feels-to-be-blind-in-your-mind/10156834777480504/) (2016).

607

608 [12] Gallagher, J. Aphantasia: Ex-Pixar chief Ed Catmull says “my mind’s eye is blind”. *BBC News*,  
609 at <https://www.bbc.com/news/health-47830256> (2019).

610



- 611 [13] Behrmann, M., & Avidan, G. Congenital prosopagnosia: face-blind from birth. *Trends Cogn.*  
612 *Sci.* **9**, 180-187 (2005).  
613
- 614 [14] Zeman, A., et al. Loss of imagery phenomenology with intact visuo-spatial task  
615 performance: a case of 'blind imagination'. *Neuropsychologia* **48**, 145-155 (2010).  
616
- 617 [15] Pearson, J. The human imagination: the cognitive neuroscience of visual mental imagery.  
618 *Nat. Rev. Neurosci.* **20**, 624–634 (2019).  
619
- 620 [16] Dijkstra, N., Bosch, S.E., & van Gerven, M.A.J. Shared neural mechanisms of visual  
621 perception and imagery. *Trends Cogn. Sci.* **23**, 423-434 (2019).  
622
- 623 [17] Marmor, G.S., & Zaback, L.A. Mental rotation by the blind: Does mental rotation depend on  
624 visual imagery? *J. Exp. Psychol. Hum. Percept. Perform.* **2**, 515-521 (1976).  
625
- 626 [18] Brandt, S.A., & Stark, L.W. Spontaneous eye movements during visual imagery reflect the  
627 content of the visual scene. *J. Cogn. Neurosci.* **9**, 27-38 (1997).  
628
- 629 [19] Kosslyn, S. *Image and Mind*. (Harvard Univ. Press, 1980).  
630
- 631 [20] Kosslyn, S. M. Mental images and the brain. *Cogn. Neuropsychol.* **22**, 333–347 (2005).  
632
- 633 [21] Pylyshyn, Z. The imagery debate: Analogue media versus tacit knowledge. *Am. Psychol.*  
634 *Assoc.* **88**, 16–45 (1981).  
635
- 636 [22] Pylyshyn, Z. Return of the mental image: are there really pictures in the brain? *Trends Cogn.*  
637 *Sci.* **7**, 113–118 (2003).  
638

639 [23] Ishai, A., Ungerleider, L., & Haxby, J. Distributed neural systems for the generation of visual  
640 images. *Neuron* **28**, 979–990 (2000).

641

642 [24] Kosslyn, S.M., Ganis, G., & Thompson, W.L. Neural foundations of imagery. *Nat. Rev.*  
643 *Neurosci.* **2**, 635-642 (2001).

644

645 [25] Schacter, D.L., et al. The future of memory: Remembering, imagining, and the brain.  
646 *Neuron* **76**, 677-694 (2012).

647

648 [26] Pearson, J., & Kosslyn, S.M. The heterogeneity of mental representation: Ending the  
649 imagery debate. *Proc. Natl. Acad. Sci. U.S.A.* **112**, 10089-10092 (2015).

650

651 [27] Behrmann, M. The mind's eye mapped onto the brain's matter. *Curr. Dir. Psychol. Sci.* **9**,  
652 50-54 (2000).

653

654 [28] Bartolomeo, P. The neural correlates of visual mental imagery: An ongoing debate. *Cortex*  
655 **44**, 107-108 (2008).

656

657 [29] Xiao, X., et al. Transformed neural pattern reinstatement during episodic memory retrieval.  
658 *J. Neurosci.* **37**, 2986-2998 (2017).

659

660 [30] Silson, E.H., et al. A posterior-anterior distinction between scene perception and scene  
661 construction in human medial parietal cortex. *J. Neurosci.* **39**, 705-717 (2019).

662

663 [31] Bainbridge, W.A., Hall, E.H., Baker, C.I. Distinct representational structure and spatial  
664 distribution for visual encoding and recall. Preprint at

665 <https://www.biorxiv.org/content/10.1101/842120v1> (2019).

666

667 [32] Stevens, A., & Coupe, P. Distortions in judged spatial relations. *Cogn. Psychol.* **10**, 422-437  
668 (1978).

669

670 [33] Denis, M., & Cocude, M. Scanning visual images generated from verbal descriptions. *Eur. J.*  
671 *Cogn. Psychol.* **1**, 293-307 (1989).

672

673 [34] Blajenkova, O., Kozhevnikov, M., & Motes, M.A. Object-spatial imagery: A new self-report  
674 imagery questionnaire. *Appl. Cogn. Psychol.* **20**, 239-263 (2006).

675

676 [35] Reagh, A.M., et al. Greater loss of object than spatial mnemonic discrimination in aged  
677 adults. *Hippocampus* **26**, 417-422 (2016).

678

679 [36] Staresina, B.P., Duncan, K.D., & Davachi, L. Perirhinal and parahippocampal cortices  
680 differentially contribute to later recollection of object- and scene-related event details. *J.*  
681 *Neurosci.* **31**, 8739-8747 (2011).

682

683 [37] Farah, M., Hammond, K., Levine, D., & Calvanio. Visual and spatial mental imagery:  
684 dissociable systems of representation. *Cogn. Psychol.* **20**, 439–462 (1988).

685

686 [38] Ungerleider, L.G., & Haxby, J.V. 'What' and 'where' in the human brain. *Curr. Opin.*  
687 *Neurobiol.* **4**, 157-165 (1994).

688

689 [39] Corballis, M. Mental rotation and the right hemisphere. *Brain Lang.* **57**, 100–121 (1997).

690

691 [40] Carlesimo, G., Perri, R., Turriziani, P., Tomaiuolo, F., & Caltagirone, C. Remembering what  
692 but not where: independence of spatial and visual working memory in the human brain. *Cortex*  
693 **37**, 519–534 (2001).

694

- 695 [41] Kravitz, D.J., Saleem, K.S., Baker, C.I., & Mishkin, M. A new neural framework for  
696 visuospatial processing. *Nat. Rev. Neurosci.* **12**, 217-230 (2011).  
697
- 698 [42] Eardley, A. F., & Pring, L. (2007). Spatial processing, mental imagery, and creativity in  
699 individuals with and without sight. *European Journal of Cognitive Psychology*, 19(1), 37-58.  
700
- 701 [43] Kerr, N. H. The role of vision in “visual imagery” experiments: Evidence from the  
702 congenitally blind. *J. Exp. Psychol. Gen.* **112**, 265 (1983).  
703
- 704 [44] Zimler, J., & Keenan, J. M. Imagery in the congenitally blind: How visual are visual images?.  
705 *J. Exp. Psychol. Learn. Mem. Cogn.* **9**, 269 (1983).  
706
- 707 [45] Cattaneo, Z., et al. Imagery and spatial processes in blindness and visual impairment.  
708 *Neurosci. Biobehav. Rev.* **32**, 1346-1360 (2008).  
709
- 710 [46] O’Craven, K.M., & Kanwisher, N. Mental imagery of faces and places activates  
711 corresponding stimulus-specific brain regions. *J. Cogn. Neurosci.* **12**, 1013-1023 (2000).  
712
- 713 [47] Lee, S.H., Kravitz, D.J., & Baker, C.I. Disentangling visual imagery and perception of real-  
714 world objects. *Neuroimage* **59**, 4064-4073 (2012).  
715
- 716 [48] Buckner, R.L., Andrews-Hanna, J.R., & Schacter, D.L. The brain’s default network: anatomy,  
717 function, and relevance to disease. *Ann. N. Y. Acad. Sci.* **1124**, 1-38 (2008).  
718
- 719 [49] Vilberg, K.L., & Rugg, M.D. Memory retrieval and the parietal cortex: A review of evidence  
720 from a dual-process perspective. *Neuropsychologia* **46**, 1787-1799 (2008).  
721
- 722 [50] Ranganath, C., & Ritchey, M. Two cortical systems for memory-guided behaviour. *Nat. Rev.*  
723 *Neurosci.* **13**, 713-726 (2012).

724

725 [51] Jacoby, L.L. A process dissociation framework: Separating automatic from intentional uses  
726 of memory. *J. Mem. Lang.* **30**, 513-541 (1991).

727

728 [52] Holdstock, J. S., et al. Under what conditions is recognition spared relative to recall after  
729 selective hippocampal damage in humans? *Hippocampus* **12**, 341-351 (2002).

730

731 [53] Staresina, B. P., & Davachi, L. Differential encoding mechanisms for subsequent associative  
732 recognition and free recall. *J. Neurosci.* **26**, 9162-9172 (2006).

733

734 [54] Barbeau, E. J., Pariente, J., Felician, O., & Puel, M. Visual recognition memory: A double  
735 anato-functional dissociation. *Hippocampus* **21**, 929-934 (2011).

736

737 [55] Bunzeck, N., Wuestenberg, T., Lutz, K., Heinze, H.-J., & Jancke, L. Scanning silence: mental  
738 imagery of complex sounds. *Neuroimage* **26**, 1119–1127 (2005).

739

740 [56] Clarke, S., Bellmann, A., Meuli, R. A., Assal, G., & Steck, A. J. Auditory agnosia and auditory  
741 spatial deficits following left hemispheric lesions: evidence for distinct processing pathways.  
742 *Neuropsychologia* **38**, 797–807 (2000).

743

744 [57] Halpern, A. Mental scanning in auditory imagery for songs. *J. Exp. Psychol. Learn. Mem.*  
745 *Cogn.* **14**, 434–443 (1988).
